# Supplementary material
Source: PubMed Central journal article supplement (PMC8209957)

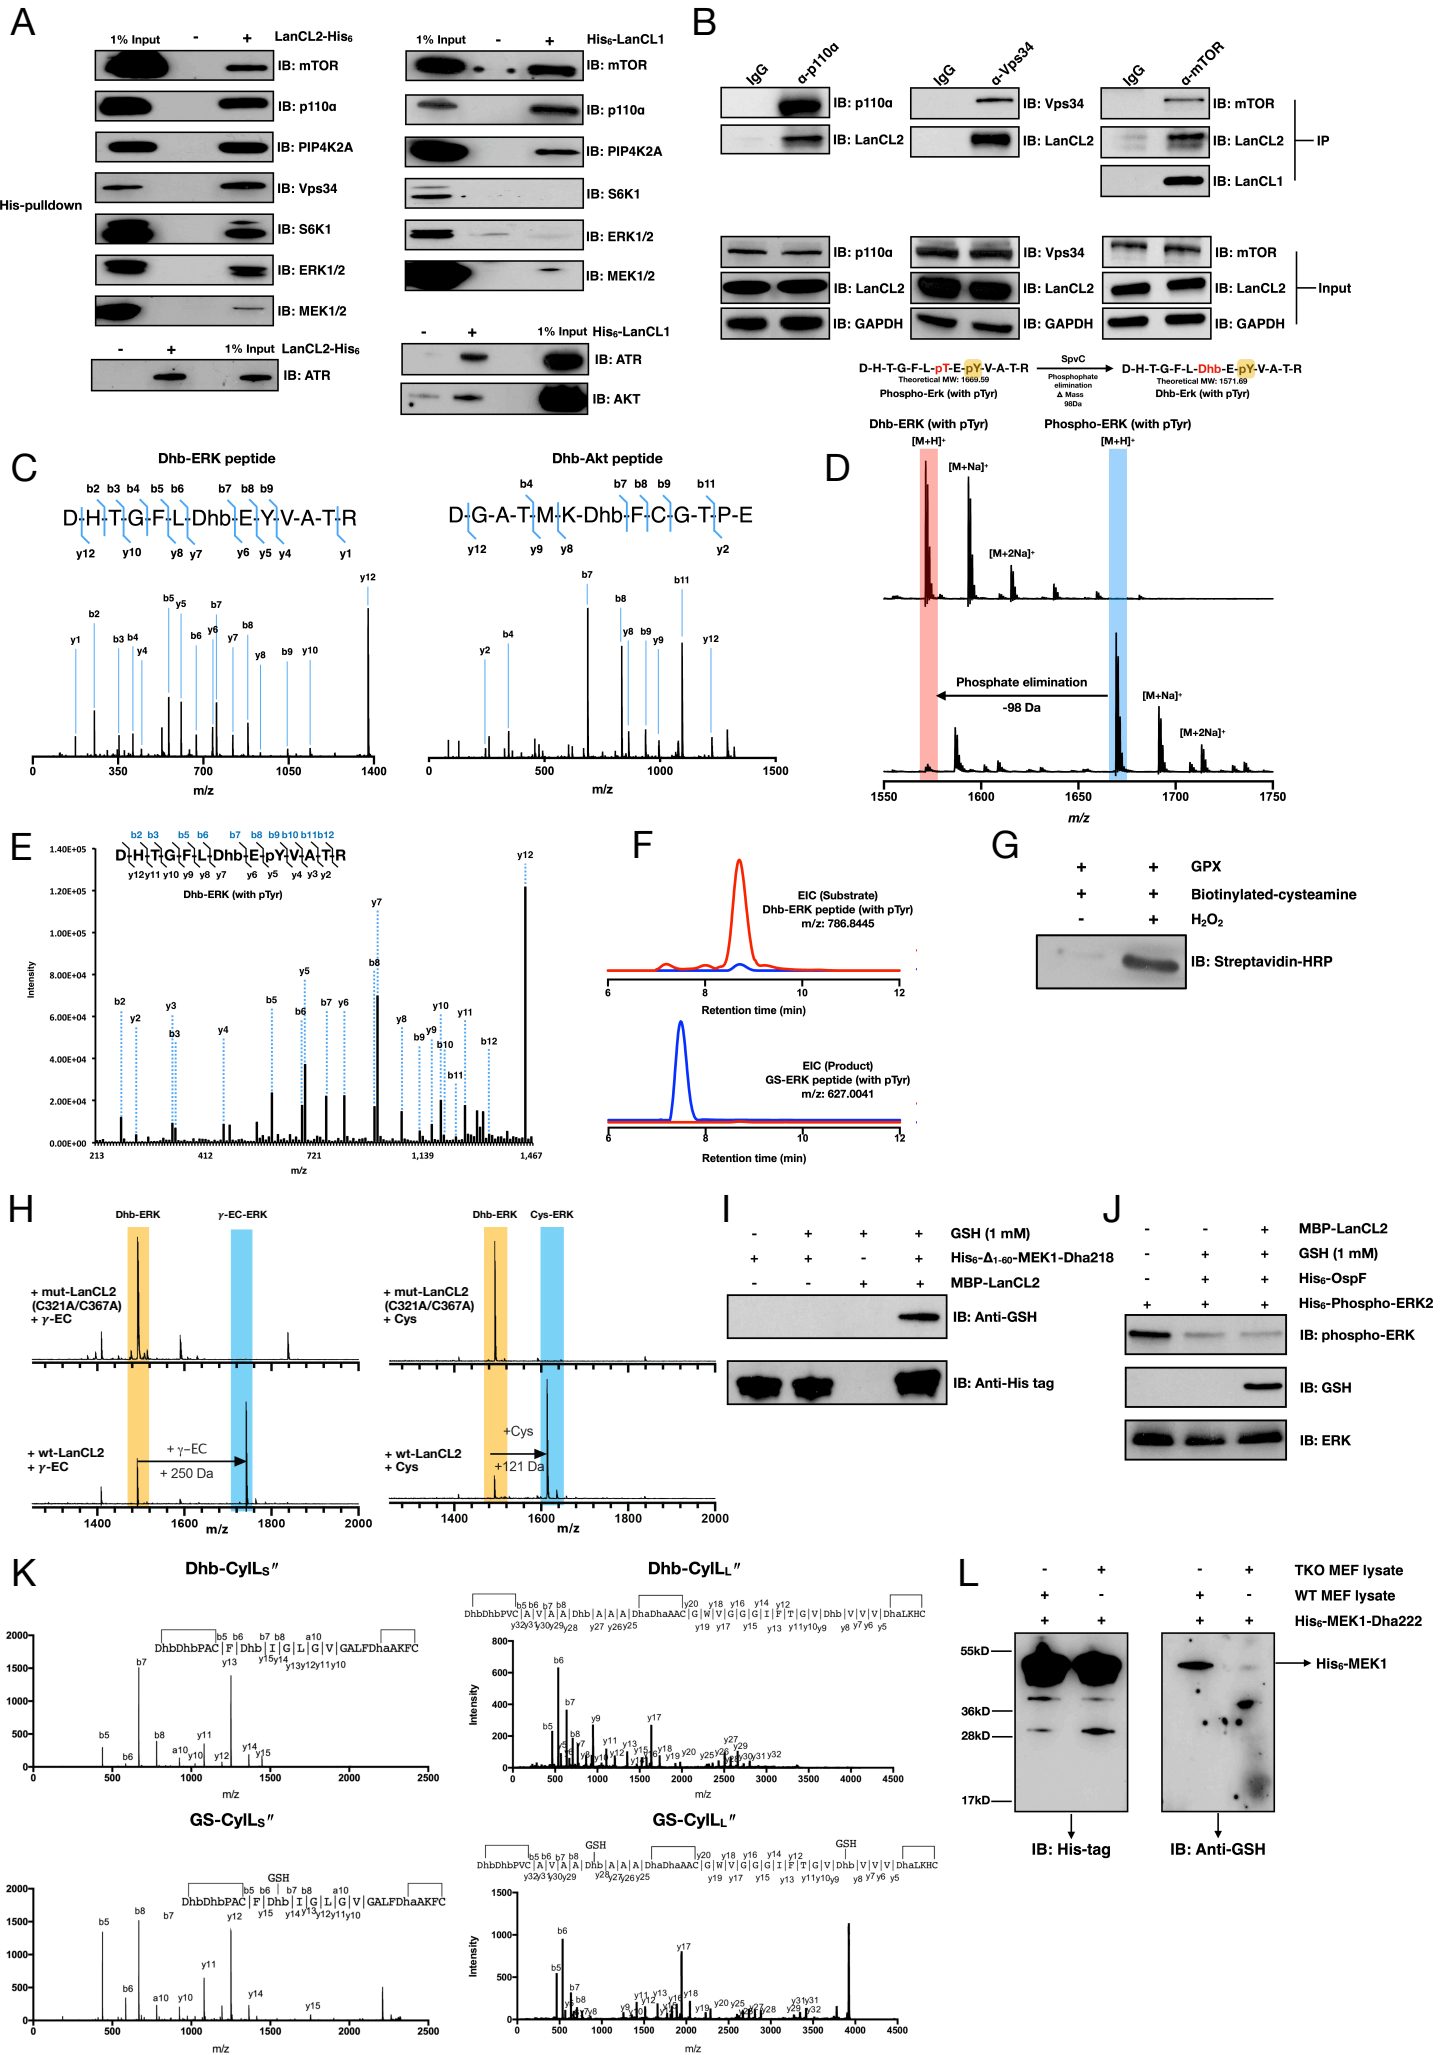

Supplement: NIHMS1690856-supplement-7.pdf [file NIHMS1690856-supplement-7.pdf]
